# Supplementary material for: Enantioselective Total Synthesis of (R,R)-Blumenol B and d9-(R,R)-Blumenol B
Source: MDPI journal article supplement (doi:10.3390/molecules27217294), 2022-10-27
Supplement: s1 [file molecules-1949371-supplementary.pdf › molecules-1949371-supplementary.pdf]

## Supporting Information

### Enantioselective total synthesis of (*R,R*)-blumenol B and d9-(*R,R*)-blumenol B.

**Shi Min Tan, Jin Wang, Shaun W. P. Rees, Rebecca Jelley, Bruno Fedrizzi\*  
and David Barker\*.**

\*b.fedrizzi@auckland.ac.nz (B. Fedrizzi), d.barker@auckland.ac.nz (D. Barker).

Supplementary Tables: S2

NMR Spectra of Novel Synthesized Compounds: S7

X-Ray diffraction (XRD) analysis: S14

## Supplementary Tables:

**Table S1.** <sup>1</sup>H NMR data of natural and synthetic (±)-1 in CD<sub>3</sub>OD.

| Position | $\delta_{\text{H}}$ mult. ( <i>J</i> in Hz) | $\delta_{\text{H}}$ mult. ( <i>J</i> in Hz) | (±)-Blumenol B (1) synthesised              |                                             |
|----------|---------------------------------------------|---------------------------------------------|---------------------------------------------|---------------------------------------------|
|          |                                             |                                             | Major Diastereomer                          | Minor Diastereomer                          |
|          |                                             |                                             | $\delta_{\text{H}}$ mult. ( <i>J</i> in Hz) | $\delta_{\text{H}}$ mult. ( <i>J</i> in Hz) |
| 2        | 2.16 dd (18, 1)                             | 2.16 dd (18, 1)                             | 2.16 d (18.1)                               | 2.16 d (18.1)                               |
|          | 2.58 d (18)                                 | 2.59 d (18)                                 | 2.60 d (18.1)                               | 2.59 d (18.1)                               |
| 4        | 5.83 dq (1, 1)                              | 5.83 dq (1, 1)                              | 5.83 s                                      | 5.83 s                                      |
|          | 1.77 ddd                                    | 1.79 ddd                                    |                                             |                                             |
| 7        | (14, 12, 5)                                 | (14, 12, 4)                                 | 1.86–1.92 m                                 | 1.86–1.92 m                                 |
|          | 1.95 ddd                                    | 1.98 ddd                                    | 1.92–2.01 m                                 | 1.92–2.01 m                                 |
|          | (14, 12, 4)                                 | (14, 12, 5)                                 |                                             |                                             |
|          | 1.43 dddd                                   | 1.40 dddd                                   |                                             |                                             |
| 8        | (13, 12, 5, 5)                              | (13, 12, 8, 5)                              | 1.36–1.47 m                                 | 1.36–1.47 m                                 |
|          | 1.65 dddd                                   | 1.68 dddd                                   | 1.64–1.72 m                                 | 1.64–1.72 m                                 |
|          | (13, 12, 7, 4)                              | (13, 12, 5, 4)                              |                                             |                                             |
| 9        | 3.66 dqd (7, 6, 5)                          | 3.65 dqd (8, 6, 5)                          | 3.62–3.69 m                                 | 3.62–3.69 m                                 |
| 10       | 1.15 d (6)                                  | 1.16 d (6)                                  | 1.17 d (6.2)                                | 1.15 d (6.2)                                |
| 11       | 1.02 s                                      | 1.02 s                                      | 1.02 s                                      | 1.02 s                                      |
| 12       | 1.10 s                                      | 1.09 s                                      | 1.10 s                                      | 1.10 s                                      |
| 13       | 2.04 d (1)                                  | 2.04 d (1)                                  | 2.04 br s                                   | 2.04 br s                                   |



**Table S3.**  $^1\text{H}$  and  $^{13}\text{C}$  assignments for synthesized (*R,R*)-blumenol B **1** and (*S,S*)-blumenol B<sup>29</sup> in  $\text{CD}_3\text{OD}$ .

| Position | <b>(<i>R,R</i>)-Blumenol B 1</b>                                       |                     | <b>(<i>S,S</i>)-Blumenol B natural</b>                |                     |
|----------|------------------------------------------------------------------------|---------------------|-------------------------------------------------------|---------------------|
|          | $\delta_{\text{H}}$ mult ( <i>J</i> in Hz)                             | $\delta_{\text{C}}$ | $\delta_{\text{H}}$ mult ( <i>J</i> in Hz)            | $\delta_{\text{C}}$ |
| 1        | N/A                                                                    | 42.9                | N/A                                                   | 43.0                |
| 2        | 2.16, dd (18.0, 1.08)<br>2.59, d (18.1)                                | 51.1                | 2.16, dd (18.0, 1.0)<br>2.59, d (18.0)                | 51.2                |
| 3        | N/A                                                                    | 200.8               | N/A                                                   | 200.9               |
| 4        | 5.83, s                                                                | 126.6               | 5.83, s                                               | 126.7               |
| 5        | N/A                                                                    | 171.8               | N/A                                                   | 171.8               |
| 6        | N/A                                                                    | 79.2                | N/A                                                   | 79.3                |
| 7        | 1.40, dddd (12.7, 11.5, 8.1, 5.1)<br>1.68, dddd (13.0, 12.2, 5.0, 3.9) | 35.3                | 1.40, dddd (13, 12, 8, 5)<br>1.68 dddd (13, 12, 5, 4) | 35.8                |
| 8        | 1.79, ddd (13.6, 12.9, 3.8)<br>1.97, ddd (27.3, 13.0, 5.2)             | 35.7                | 1.79, ddd (14, 12, 4)<br>1.98, ddd (14, 12, 5)        | 35.4                |
| 9        | 3.61–3.69, m                                                           | 69.3                | 3.65, dqd (8, 6, 5)                                   | 69.4                |
| 10       | 1.17, d (6.2)                                                          | 23.7                | 1.16, d (6)                                           | 23.7                |
| 11       | 1.09, s                                                                | 24.0                | 1.09, s                                               | 24.6                |
| 12       | 1.02, s                                                                | 24.5                | 1.02, s                                               | 24.1                |
| 13       | 2.04, d (1.4)                                                          | 21.8                | 2.04, d (1)                                           | 21.8                |

## NMR Spectra of Novel Synthesized Compounds:

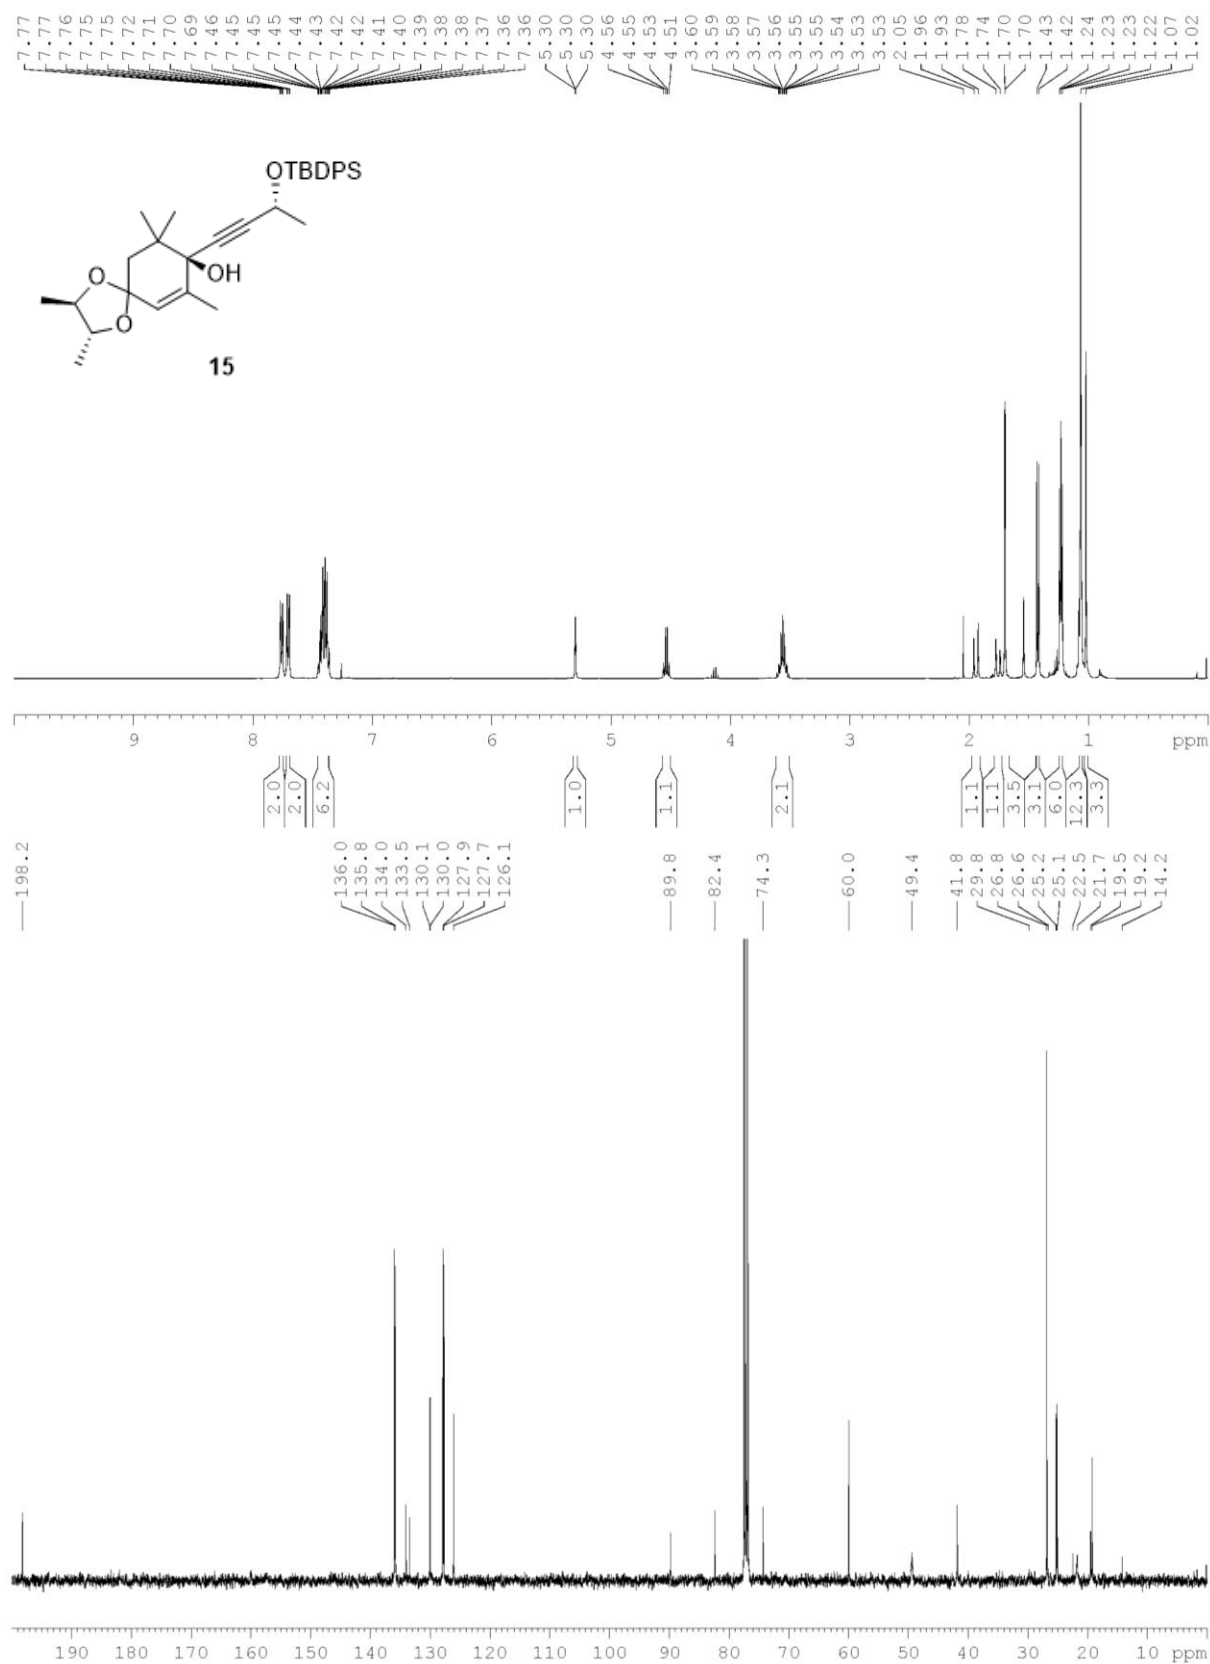

Figure S1: <sup>1</sup>H NMR and <sup>13</sup>C NMR Spectra of 15.

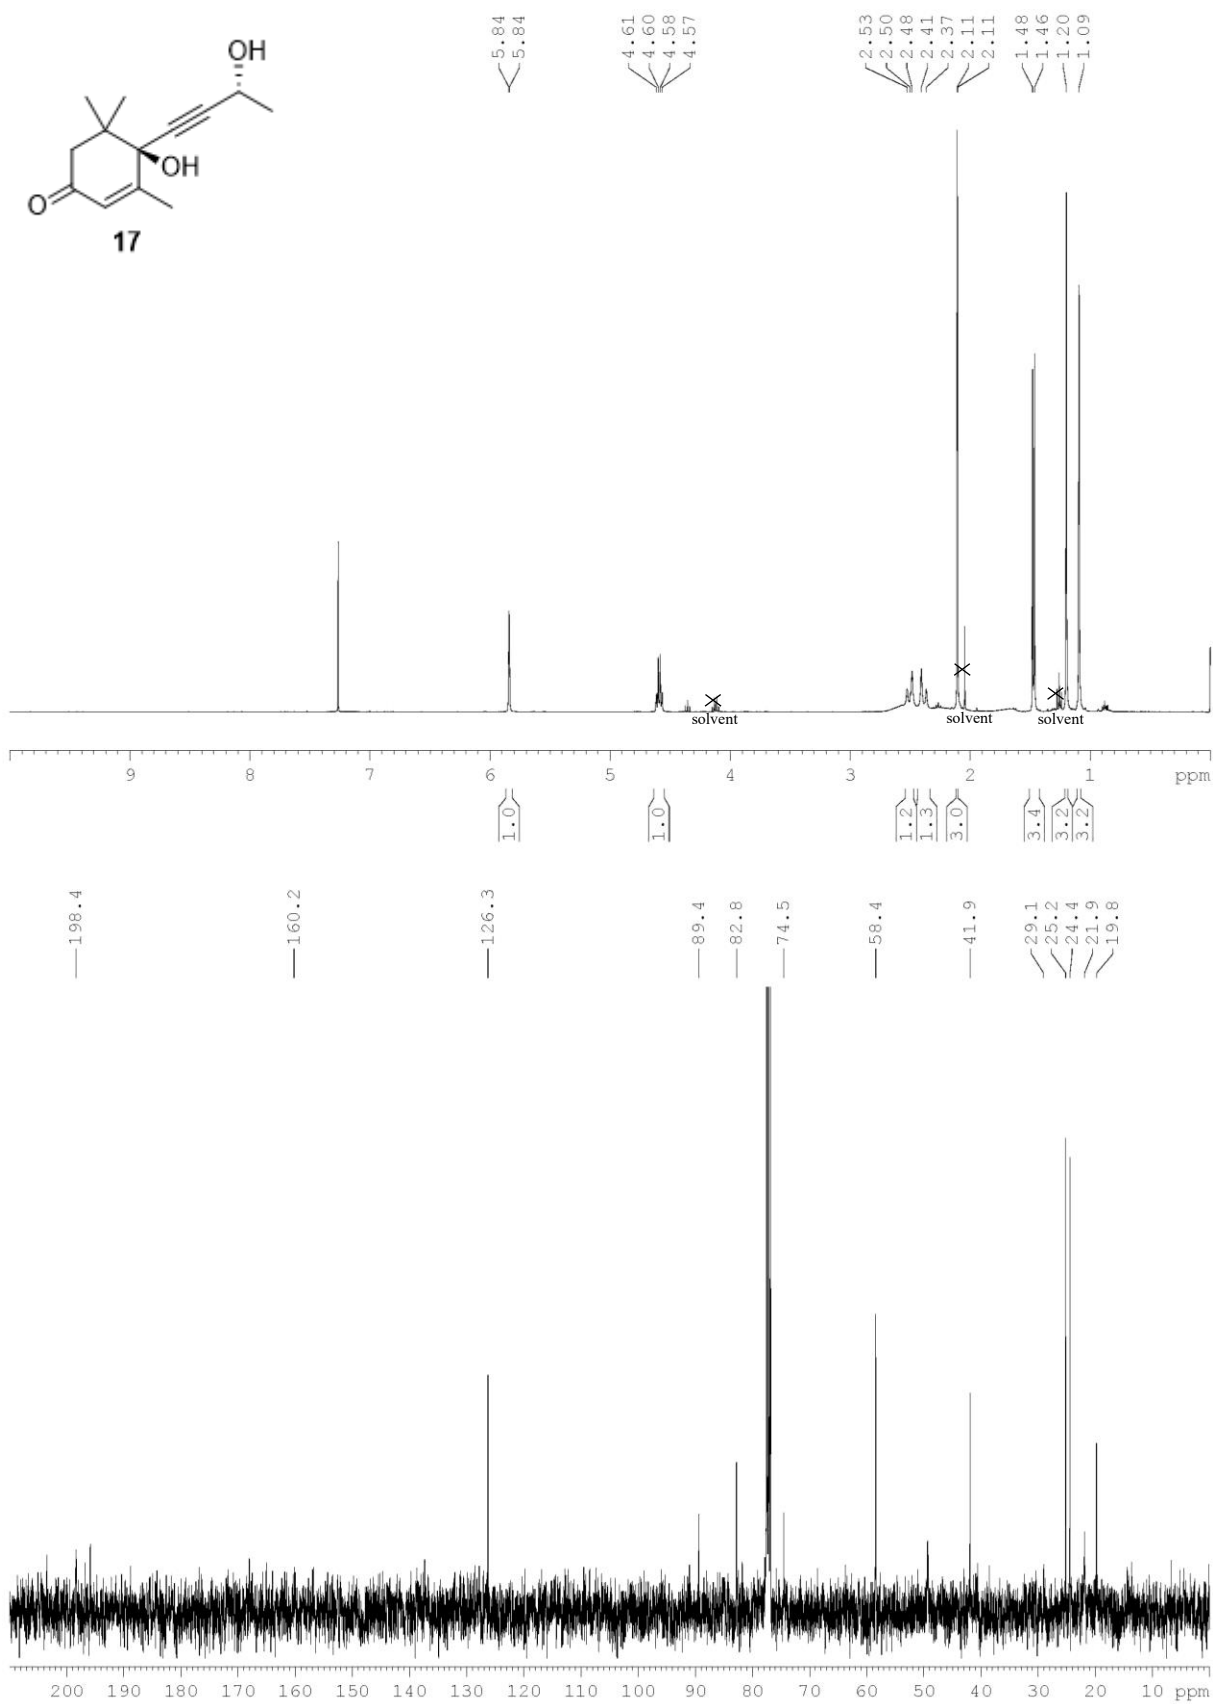

**Figure S2:** <sup>1</sup>H NMR and <sup>13</sup>C NMR Spectra of 17. This compound was found to be very volatile and was prone to evaporation if placed under strong vacuum.

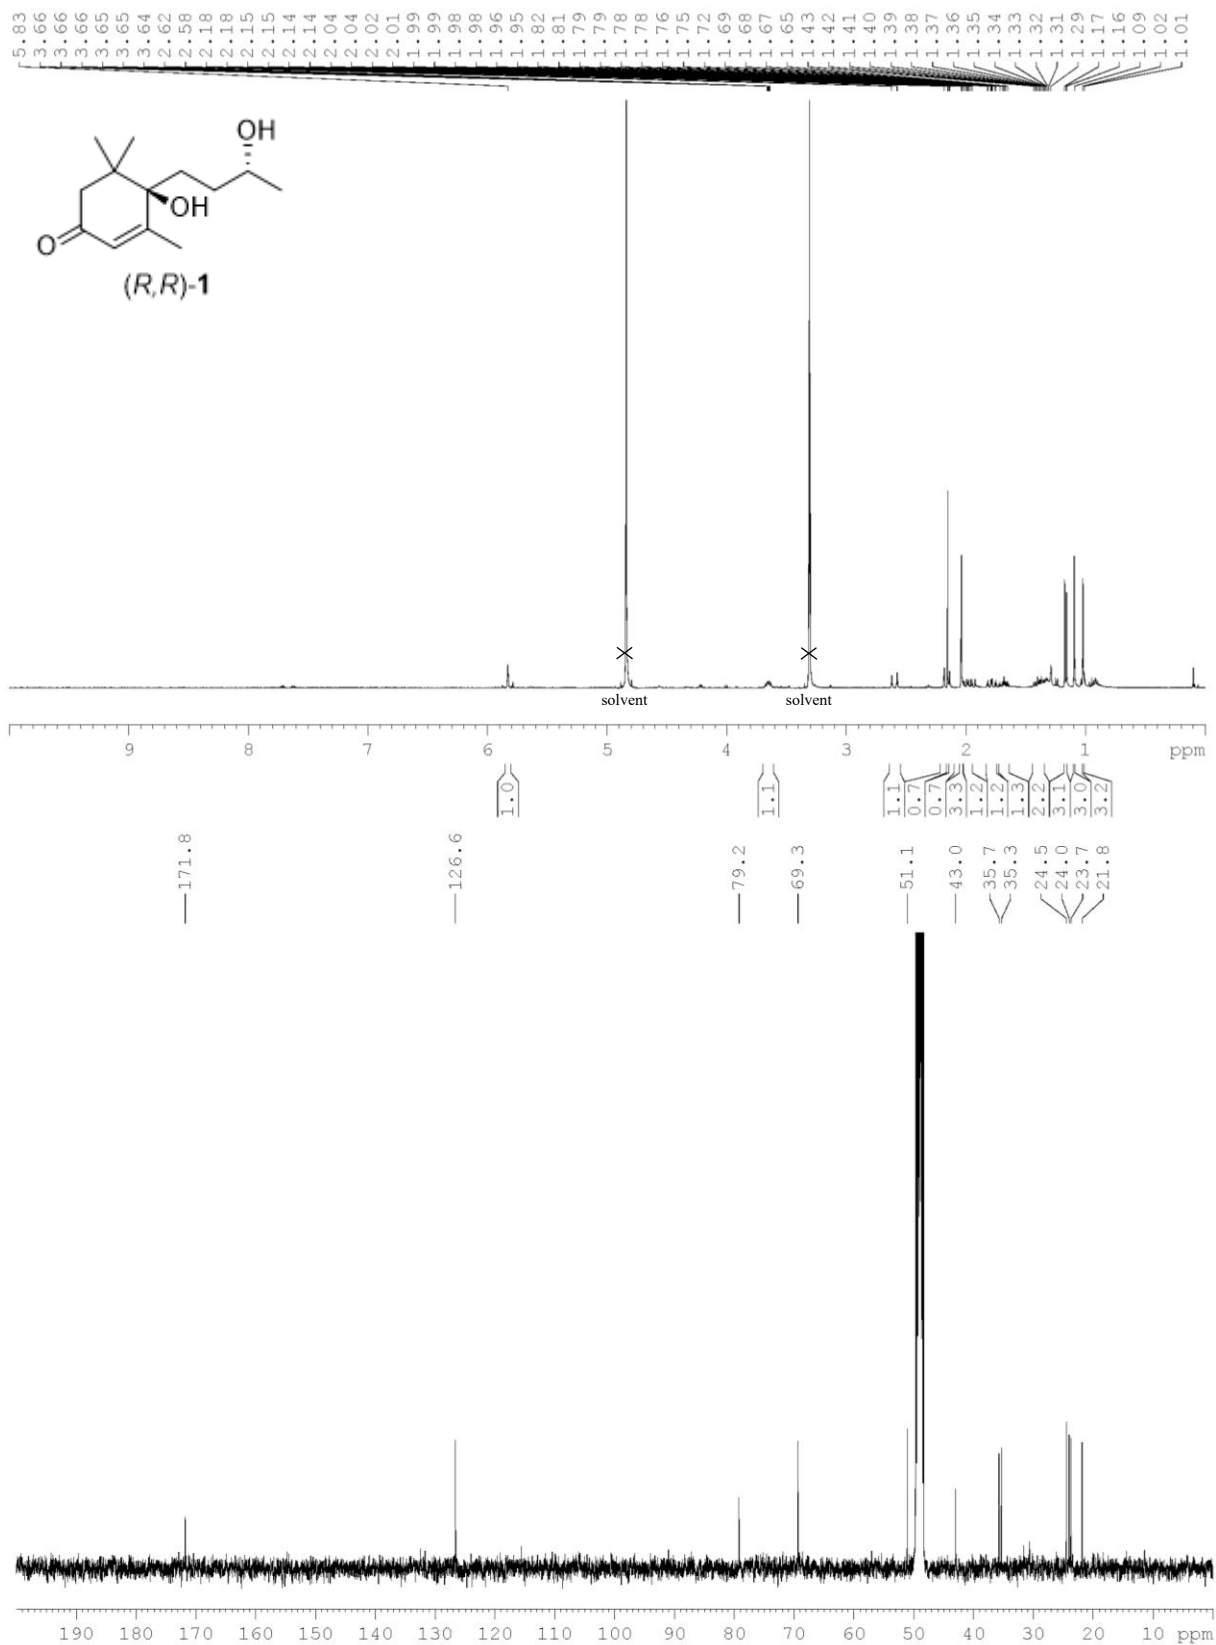

Figure S3: <sup>1</sup>H NMR and <sup>13</sup>C NMR Spectra of (R,R)-1.

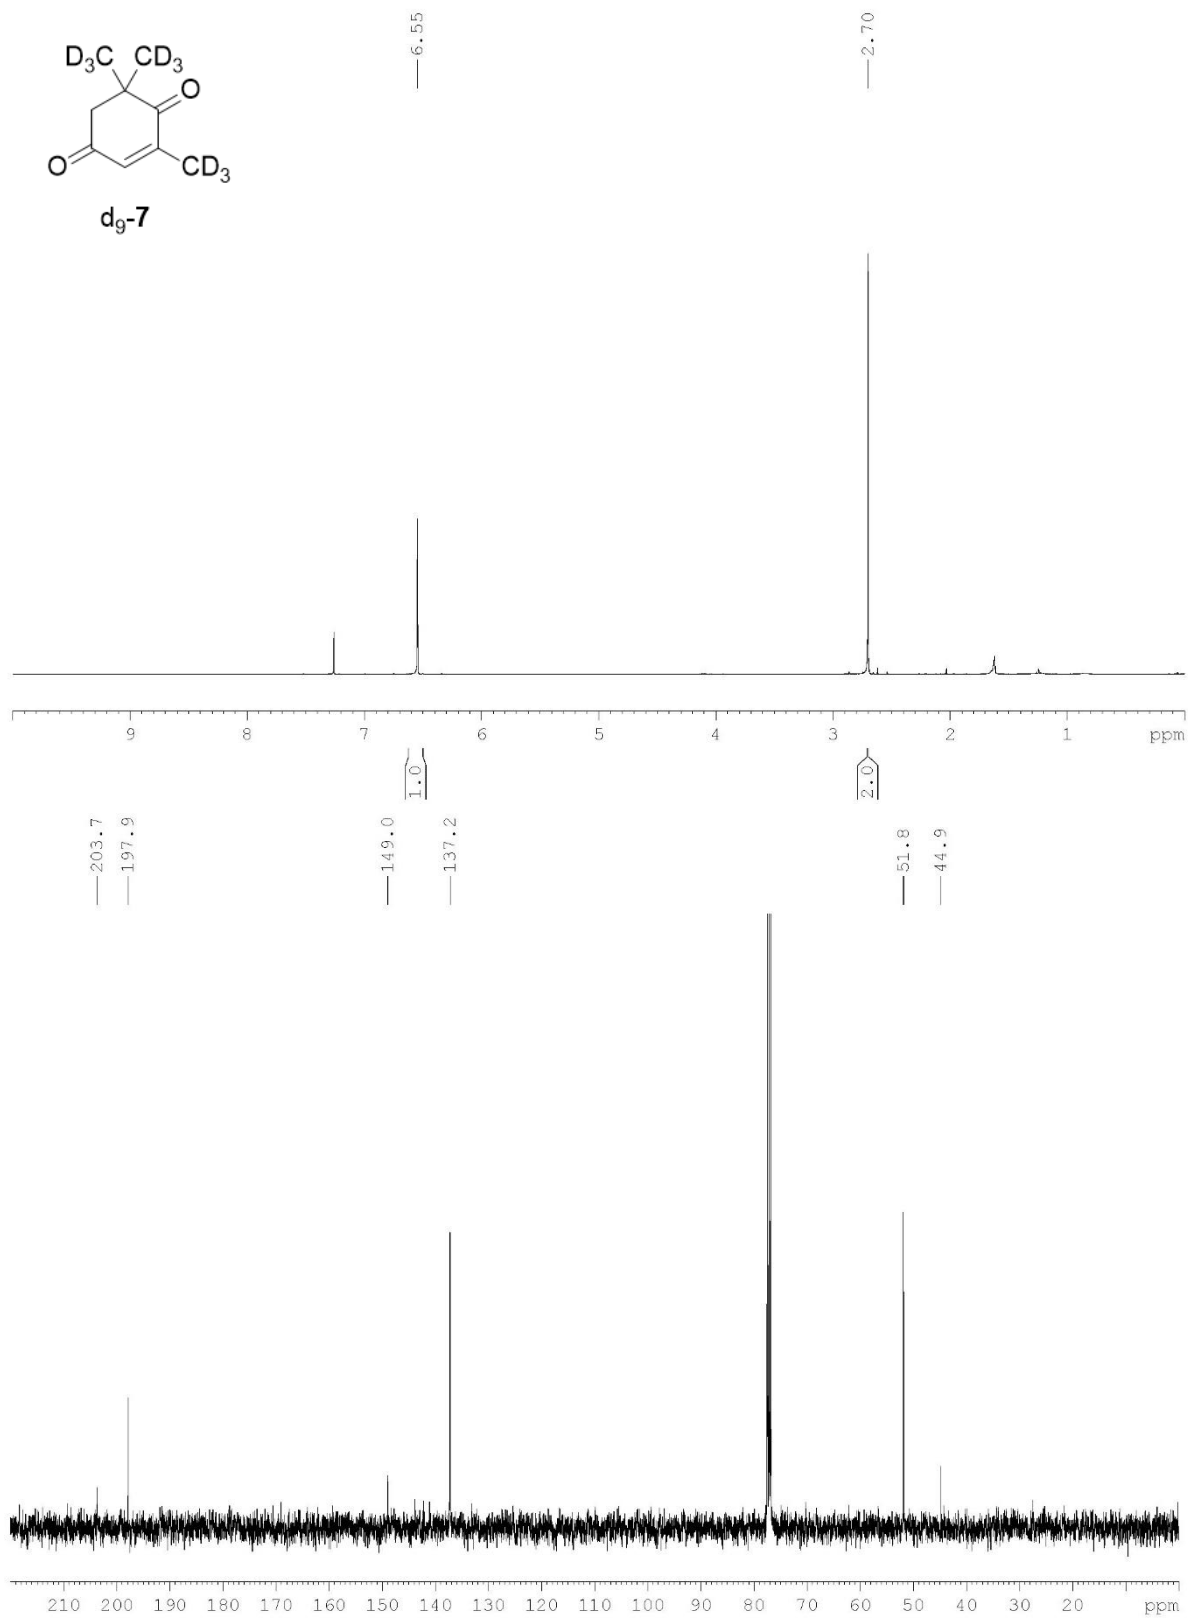

**Figure S4:** <sup>1</sup>H NMR and <sup>13</sup>C NMR Spectra of d<sub>9</sub>-7.

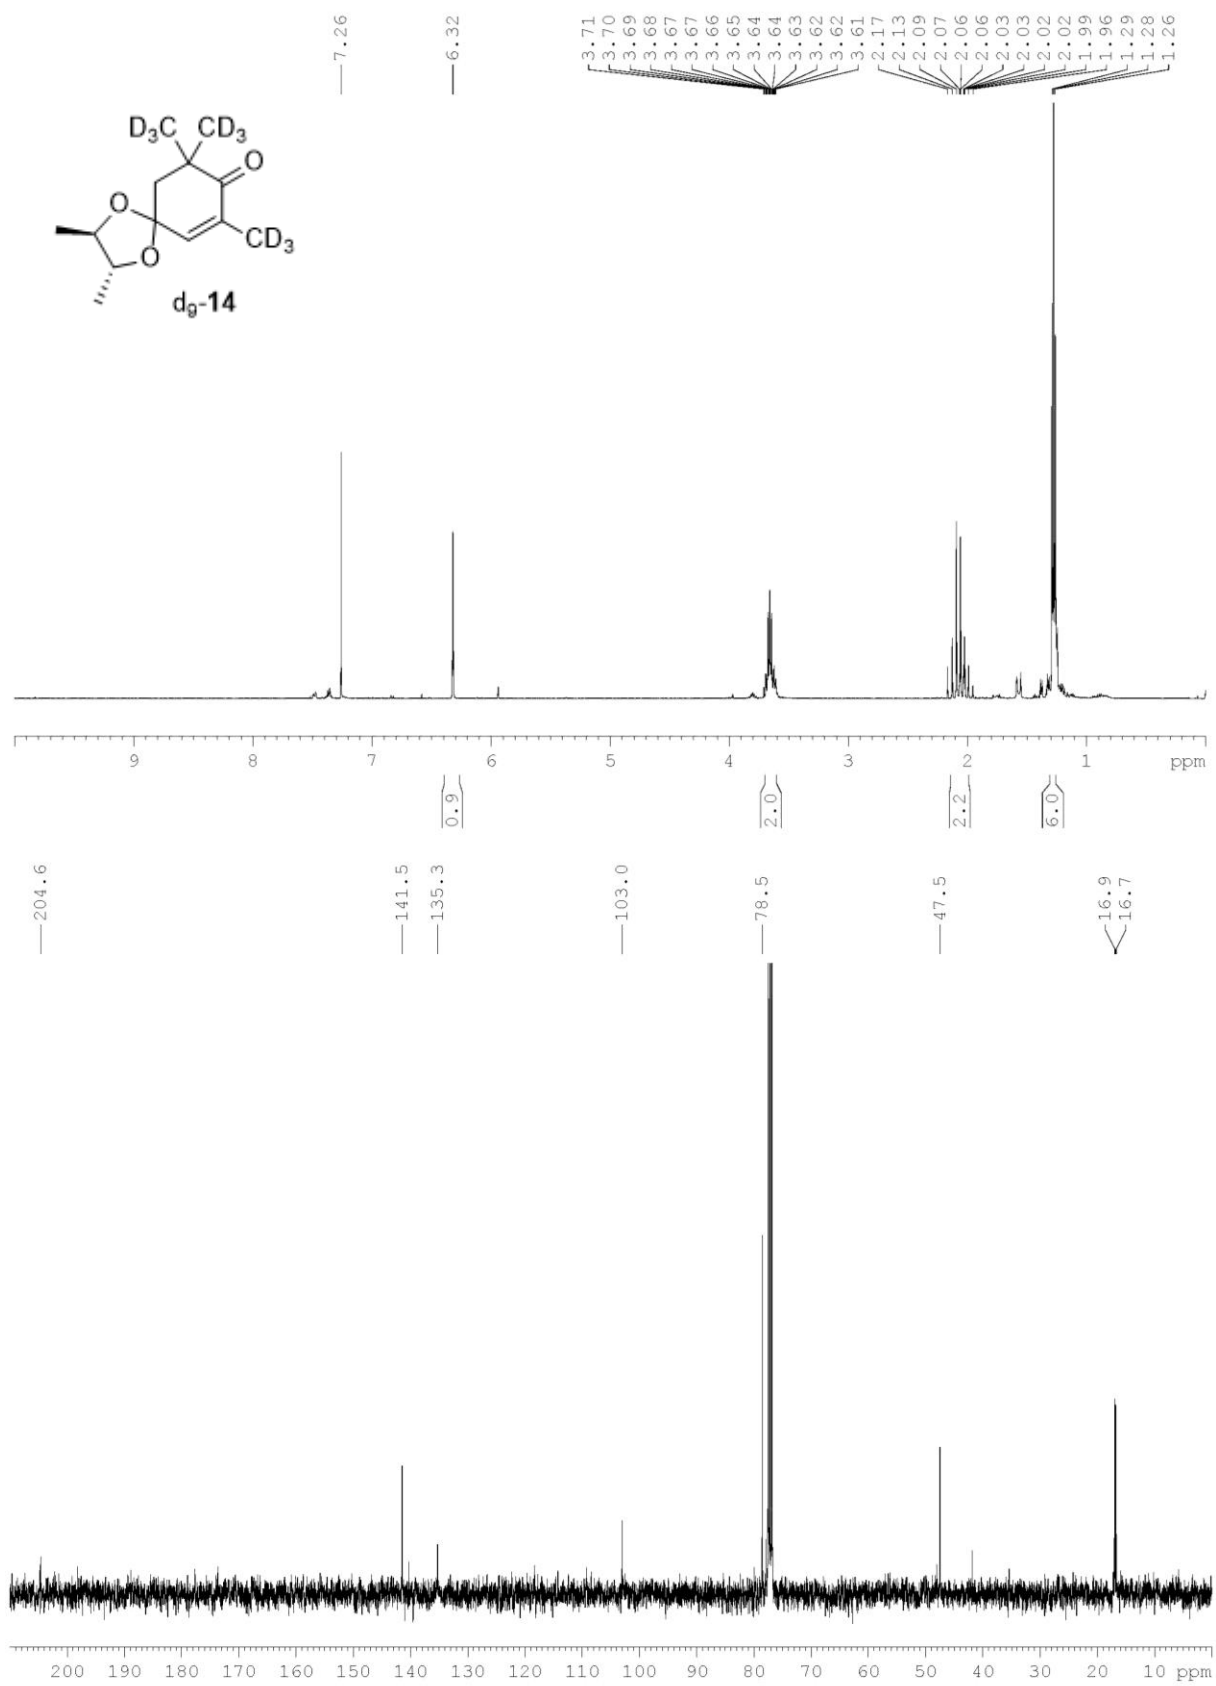

**Figure S5: <sup>1</sup>H NMR and <sup>13</sup>C NMR Spectra of d<sub>9</sub>-14.**

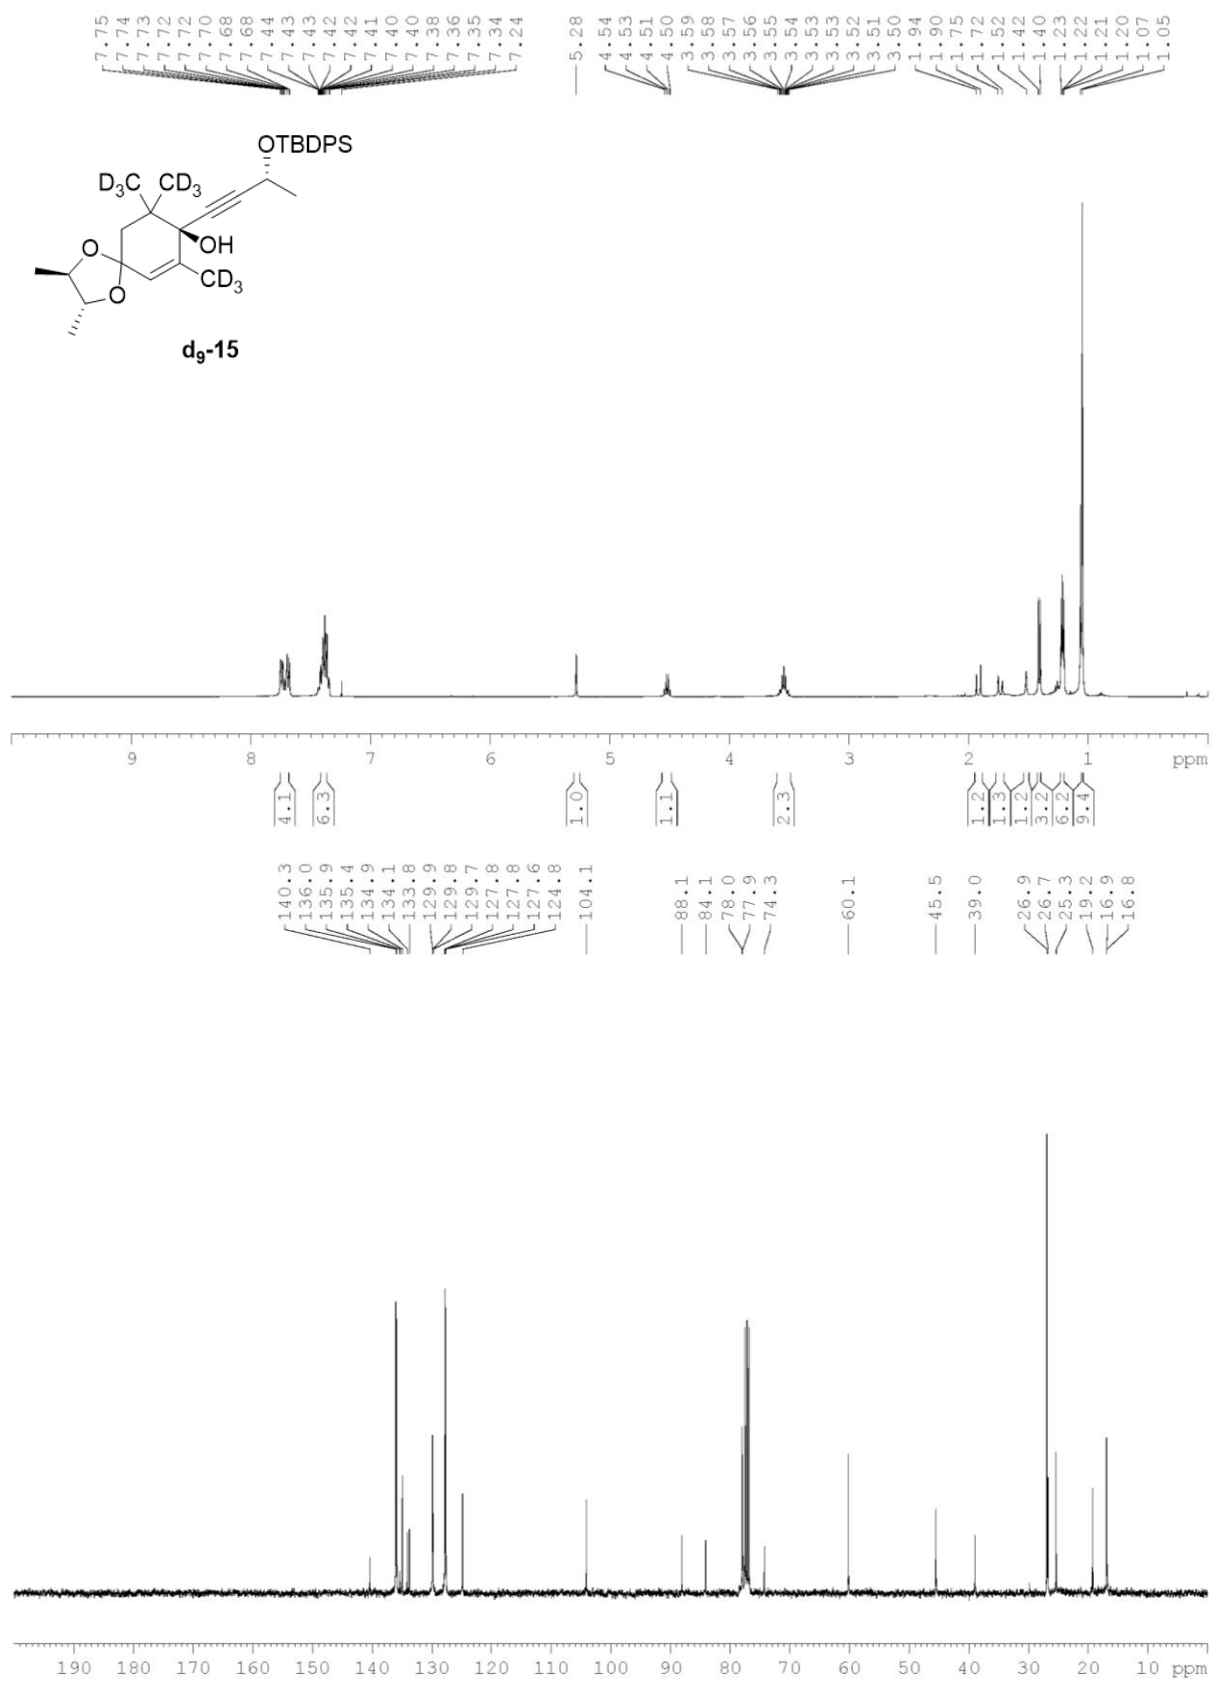

**Figure S6:**  $^1H$ NMR and  $^{13}C$ NMR Spectra of  $d_9$ -15.

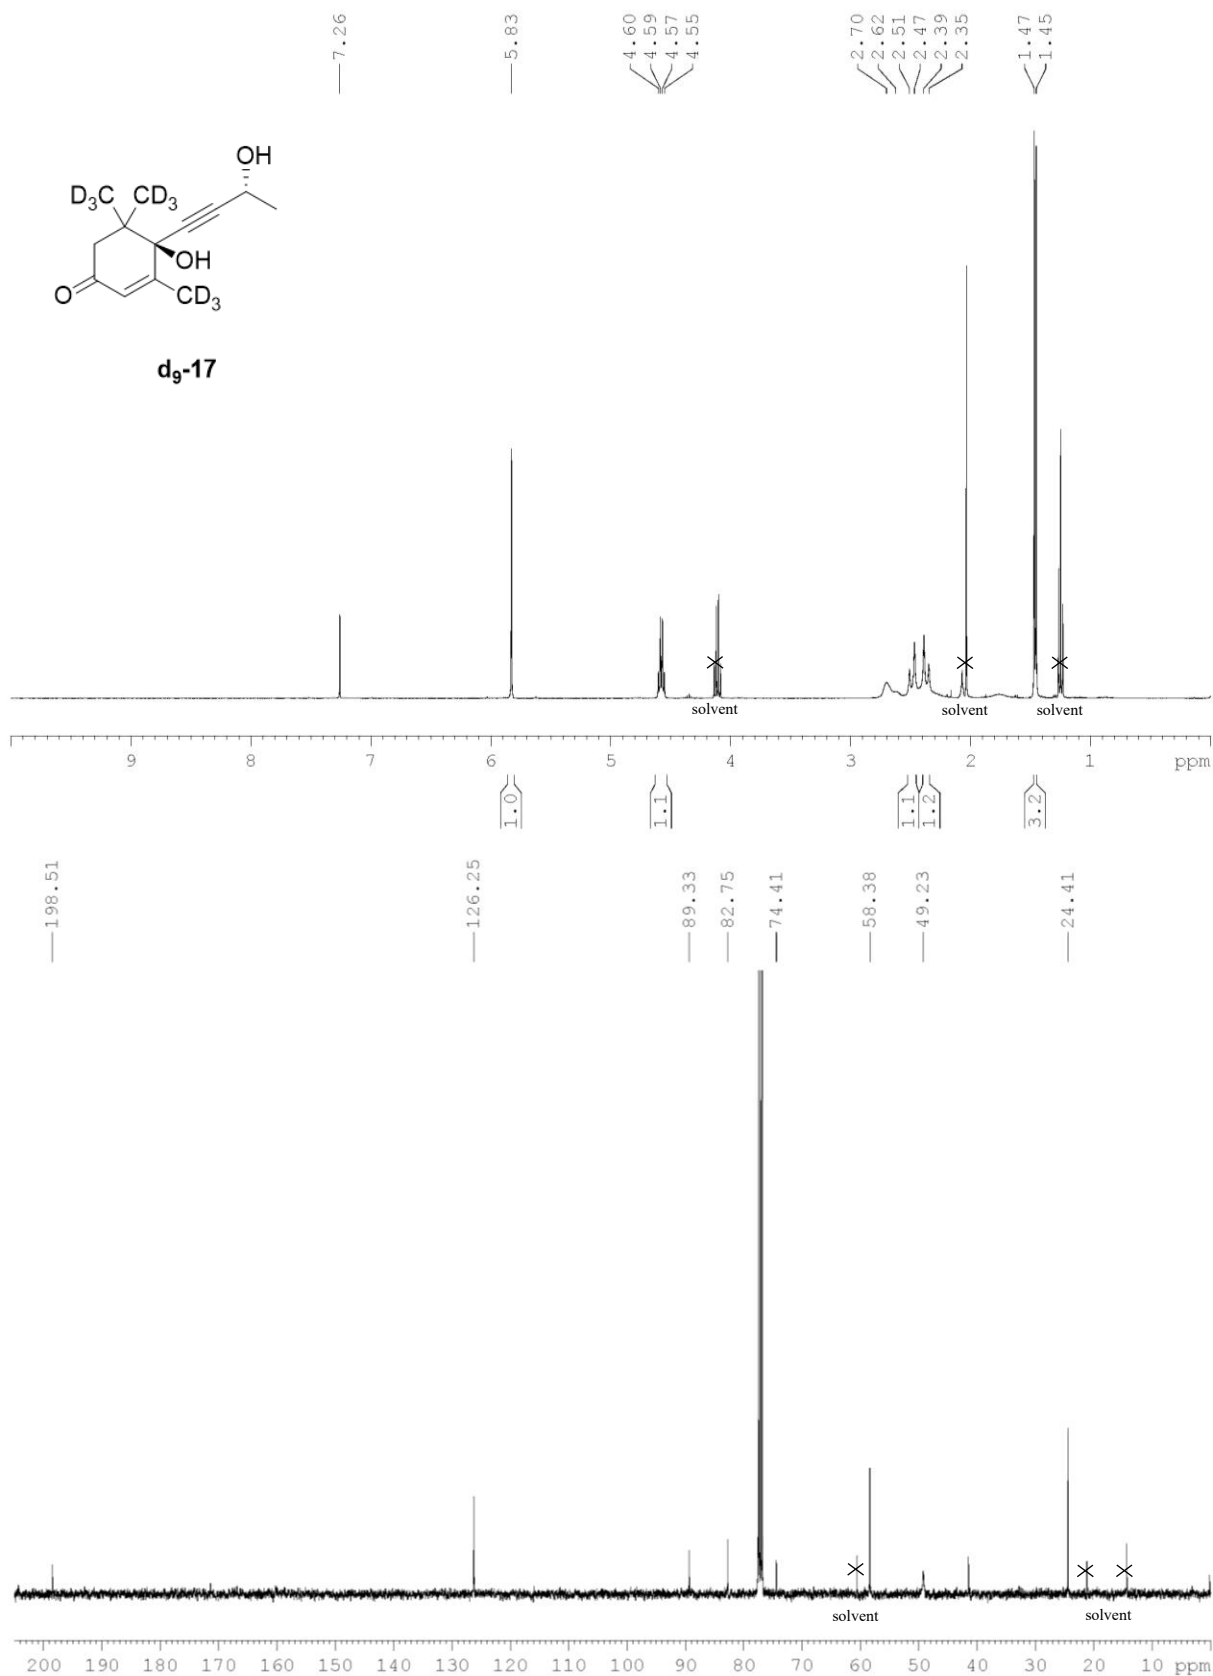

**Figure S7:** <sup>1</sup>H NMR and <sup>13</sup>C NMR Spectra of d<sub>9</sub>-17. This compound was found to be very volatile and was prone to evaporation if placed under strong vacuum.

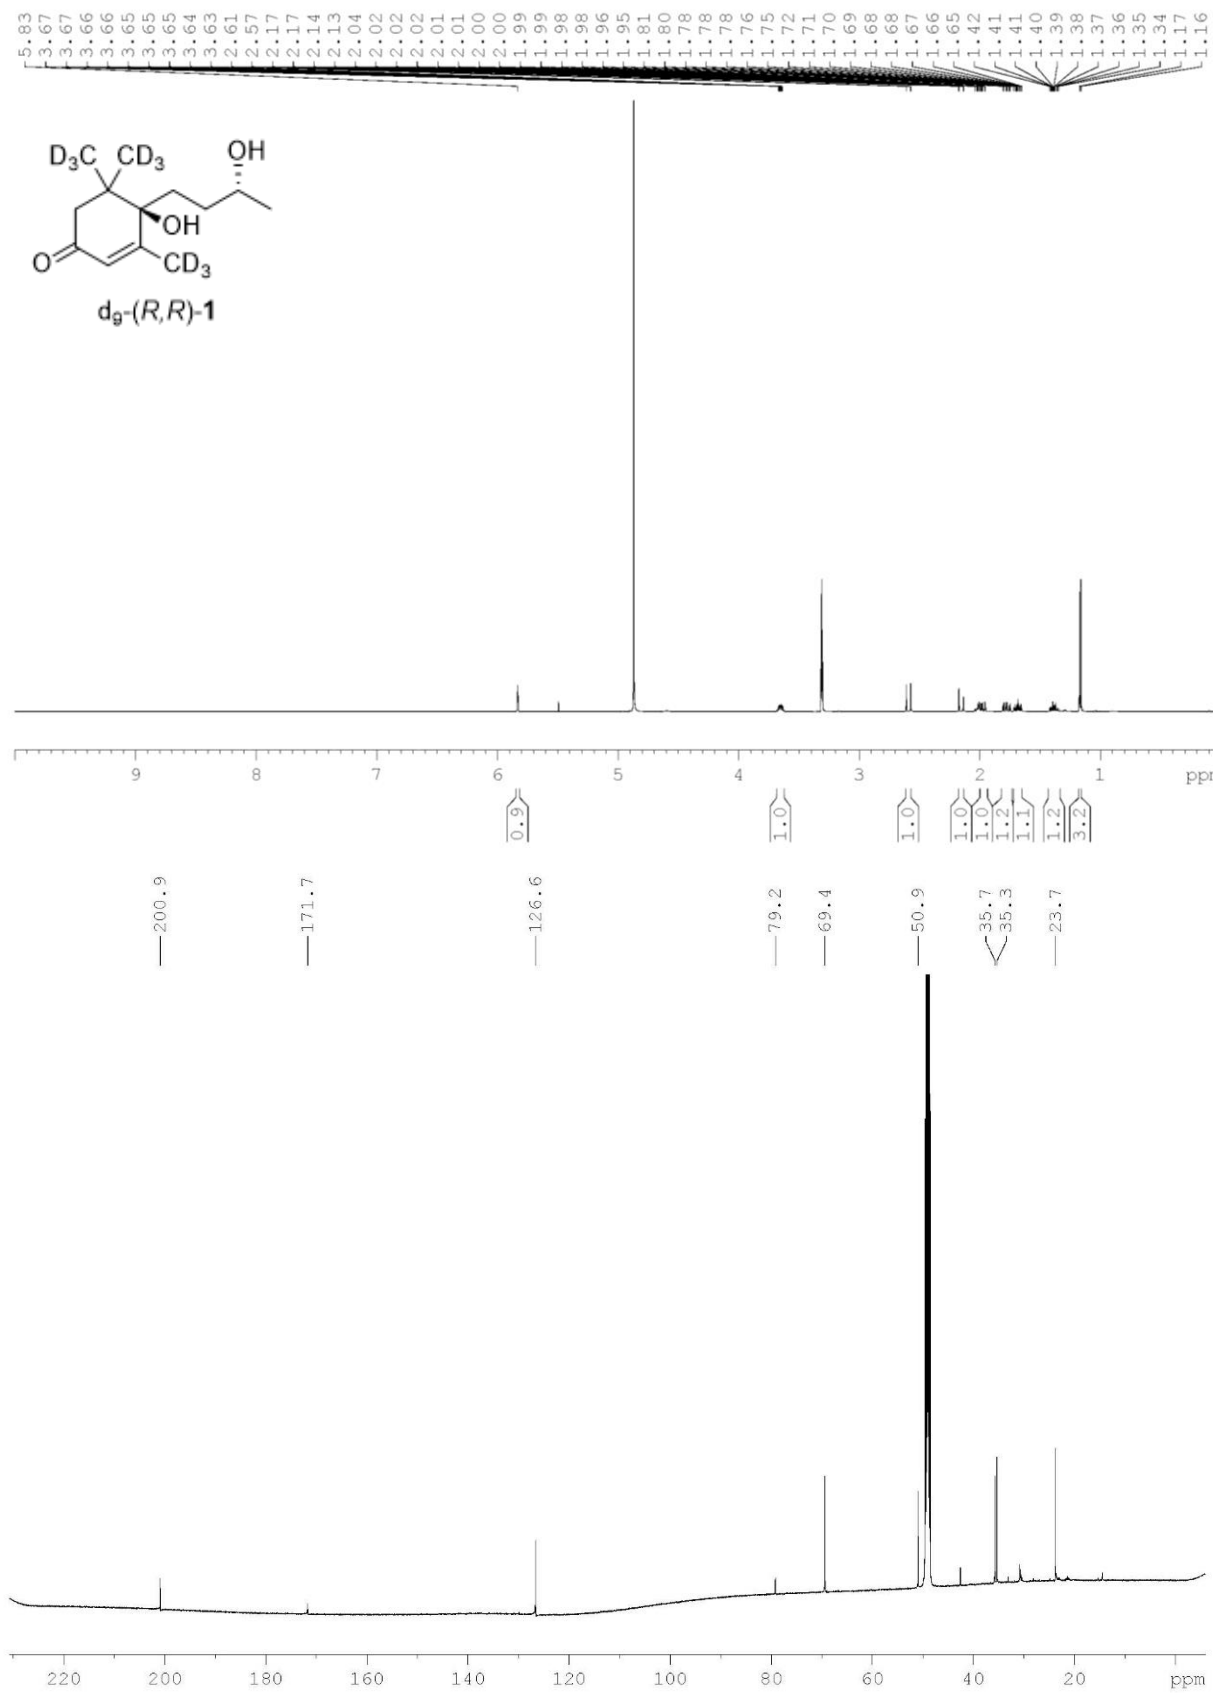

Figure S8:  $^1\text{H NMR}$  and  $^{13}\text{C NMR}$  Spectra of  $d_9$ -(*R,R*)-1.

## X-Ray diffraction (XRD) analysis for compound **d<sub>9</sub>-(R,R)-16**:

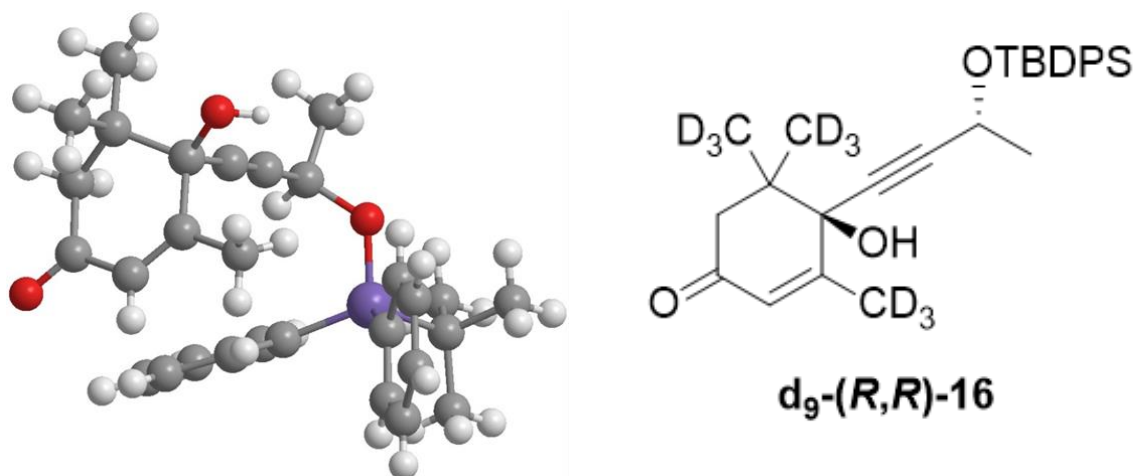

**Figure S1:** XRD analysis of **d<sub>9</sub>-(R,R)-16**.

### Experimental

A suitable single crystal of C<sub>29</sub>H<sub>36</sub>O<sub>3</sub>Si [**d<sub>9</sub>-(R,R)-16**] was selected and run on a XtaLAB Synergy, Dualflex, Pilatus 200K diffractometer. The crystal was kept at 100.02(10) K during data collection. Using Olex2 [1], the structure was solved with the ShelXT [2] structure solution program using Intrinsic Phasing and refined with the ShelXL [3] refinement package using Least Squares minimisation.

[1] Dolomanov, O.V., Bourhis, L.J., Gildea, R.J, Howard, J.A.K. & Puschmann, H. (2009), *J. Appl. Cryst.* 42, 339-341.

[2] Sheldrick, G.M. (2015). *Acta Cryst.* A71, 3-8.

[3] Sheldrick, G.M. (2015). *Acta Cryst.* C71, 3-8.

**Crystal Data** for [**d<sub>9</sub>-(R,R)-16**] C<sub>29</sub>H<sub>36</sub>O<sub>3</sub>Si (*M* = 460.67 g/mol): monoclinic, space group C2 (no. 5), *a* = 15.0513(3) Å, *b* = 13.3427(2) Å, *c* = 13.3314(3) Å, *β* = 91.162(2)°, *V* = 2676.73(9) Å<sup>3</sup>, *Z* = 4, *T* = 100.02(10) K, *μ*(Cu Kα) = 0.973 mm<sup>-1</sup>, *D*<sub>calc</sub> = 1.143 g/cm<sup>3</sup>, 15574 reflections measured (11.144° ≤ 2θ ≤ 136.488°), 4879 unique (*R*<sub>int</sub> = 0.0565, *R*<sub>sigma</sub> = 0.0555) which were used in all calculations. The final *R*<sub>1</sub> was 0.0340 (*I* > 2σ(*I*)) and *wR*<sub>2</sub> was 0.0818 (all data).

### Refinement model description

Number of restraints - 1, number of constraints - unknown.

Details:

1. Fixed Uiso

At 1.2 times of:

All C(H) groups, All C(H,H) groups

At 1.5 times of:

All C(H,H,H) groups, All O(H) groups

2.a Ternary CH refined with riding coordinates:

C00B(H00D)

2.b Secondary CH2 refined with riding coordinates:

C00D(H00E,H00F)

2.c Aromatic/amide H refined with riding coordinates:

C008(H008), C009(H009), C00J(H00J), C00K(H00K), C00M(H00M), C00O(H00P),  
C00P(H00Q), C00Q(H00R), C00T(H00Y), C00V(H00), C00W(H1)

2.d Idealised Me refined as rotating group:

C005(H00A,H00B,H00C), C00I(H00G,H00H,H00I), C00N(H00L,H00N,H00O),  
C00R(H00S,  
H00T,H00U), C00S(H00V,H00W,H00X), C00U(H00Z,H,HA), C00X(H2,HB,HC)

2.e Idealised tetrahedral OH refined as rotating group:

O003(H003)

**Table S4 Crystal data and structure refinement for [d<sub>9</sub>-(R,R)-16]**

|                                      |                                                   |
|--------------------------------------|---------------------------------------------------|
| Identification code                  | [d <sub>9</sub> -(R,R)-16]                        |
| Empirical formula                    | C <sub>29</sub> H <sub>36</sub> O <sub>3</sub> Si |
| Formula weight                       | 460.67                                            |
| Temperature/K                        | 100.02(10)                                        |
| Crystal system                       | monoclinic                                        |
| Space group                          | C2                                                |
| a/Å                                  | 15.0513(3)                                        |
| b/Å                                  | 13.3427(2)                                        |
| c/Å                                  | 13.3314(3)                                        |
| α/°                                  | 90                                                |
| β/°                                  | 91.162(2)                                         |
| γ/°                                  | 90                                                |
| Volume/Å <sup>3</sup>                | 2676.73(9)                                        |
| Z                                    | 4                                                 |
| ρ <sub>calc</sub> /g/cm <sup>3</sup> | 1.143                                             |
| μ/mm <sup>-1</sup>                   | 0.973                                             |
| F(000)                               | 992.0                                             |
| Crystal size/mm <sup>3</sup>         | ? × ? × ?                                         |
| Radiation                            | Cu Kα (λ = 1.54184)                               |
| 2θ range for data collection/°       | 11.144 to 136.488                                 |

|                                                |                                                               |
|------------------------------------------------|---------------------------------------------------------------|
| Index ranges                                   | $-18 \leq h \leq 17, -16 \leq k \leq 16, -16 \leq l \leq 15$  |
| Reflections collected                          | 15574                                                         |
| Independent reflections                        | 4879 [ $R_{\text{int}} = 0.0565, R_{\text{sigma}} = 0.0555$ ] |
| Data/restraints/parameters                     | 4879/1/306                                                    |
| Goodness-of-fit on $F^2$                       | 1.040                                                         |
| Final R indexes [ $I \geq 2\sigma(I)$ ]        | $R_1 = 0.0340, wR_2 = 0.0803$                                 |
| Final R indexes [all data]                     | $R_1 = 0.0369, wR_2 = 0.0818$                                 |
| Largest diff. peak/hole / $e \text{ \AA}^{-3}$ | 0.30/-0.25                                                    |
| Flack parameter                                | 0.033(17)                                                     |

**Table S5 Fractional Atomic Coordinates ( $\times 10^4$ ) and Equivalent Isotropic Displacement Parameters ( $\text{\AA}^2 \times 10^3$ ) for [d<sub>9</sub>-(*R,R*)-16].  $U_{\text{eq}}$  is defined as 1/3 of the trace of the orthogonalised  $U_{ij}$  tensor.**

| Atom | <i>x</i>   | <i>y</i>   | <i>z</i>   | $U(\text{eq})$ |
|------|------------|------------|------------|----------------|
| Si01 | 2298.1(4)  | 6110.4(5)  | 1523.3(5)  | 17.47(16)      |
| O002 | 1883.2(11) | 6902.5(13) | 2352.7(13) | 19.5(4)        |
| O003 | 2821.1(13) | 5784.6(14) | 6147.2(14) | 25.3(4)        |
| O004 | 1337.3(13) | 2292.3(14) | 4867.4(15) | 27.8(4)        |
| C005 | 711.2(17)  | 7616.1(19) | 3313(2)    | 21.8(5)        |
| C006 | 2270.6(18) | 6808(2)    | 283(2)     | 23.4(6)        |
| C007 | 1626.2(18) | 4929.1(19) | 1572.0(19) | 21.7(5)        |
| C008 | 2540.0(17) | 3419.6(18) | 4831.5(19) | 20.0(5)        |
| C009 | 3895.0(17) | 6293.9(19) | 2708(2)    | 22.1(5)        |
| C00A | 2870.2(16) | 4325.3(18) | 5045.2(18) | 17.6(5)        |
| C00B | 1209.4(16) | 6659.9(18) | 3056.9(19) | 17.4(5)        |
| C00C | 1561.7(17) | 4688(2)    | 6175(2)    | 22.2(5)        |
| C00D | 1060.1(17) | 3911(2)    | 5539(2)    | 23.4(6)        |
| C00E | 3477.0(18) | 5814.7(19) | 1898(2)    | 22.8(5)        |
| C00F | 1904.2(16) | 5721.8(18) | 4659(2)    | 19.1(5)        |

|      |            |            |            |         |
|------|------------|------------|------------|---------|
| C00G | 1600.0(15) | 6159(2)    | 3944.4(18) | 18.4(5) |
| C00H | 2296.2(16) | 5152.0(19) | 5512.9(19) | 19.2(5) |
| C00I | 1980.3(19) | 4197(2)    | 7108(2)    | 26.0(6) |
| C00J | 1912(2)    | 4124(2)    | 2171(2)    | 29.3(6) |
| C00K | 4776.3(17) | 6086(2)    | 2976(2)    | 28.5(6) |
| C00L | 1634.1(17) | 3129(2)    | 5068(2)    | 20.4(5) |
| C00M | 783.5(19)  | 4847(2)    | 1118(2)    | 28.6(6) |
| C00N | 3800.8(17) | 4618(2)    | 4810(2)    | 25.7(6) |
| C00O | 3971(2)    | 5111(2)    | 1364(2)    | 34.4(7) |
| C00P | 256(2)     | 4005(2)    | 1246(2)    | 36.0(7) |
| C00Q | 1382(2)    | 3278(2)    | 2295(2)    | 37.6(8) |
| C00R | 911(2)     | 5496(2)    | 6509(2)    | 31.8(6) |
| C00S | 2913(2)    | 7697(2)    | 396(2)     | 35.3(7) |
| C00T | 5256.1(19) | 5407(2)    | 2428(2)    | 35.1(7) |
| C00U | 2563(3)    | 6144(3)    | -576(2)    | 43.8(8) |
| C00V | 556(2)     | 3224(2)    | 1824(2)    | 38.8(8) |
| C00W | 4856(2)    | 4915(3)    | 1626(3)    | 40.8(8) |
| C00X | 1344(2)    | 7233(3)    | 38(3)      | 46.7(9) |

**Table S6 Anisotropic Displacement Parameters ( $\text{\AA}^2 \times 10^3$ ) for [d<sub>9</sub>-(R,R)-16].** The Anisotropic displacement factor exponent takes the form:  $-2\pi^2[h^2a^*2U_{11}+2hka^*b^*U_{12}+\dots]$ .

| Atom | U <sub>11</sub> | U <sub>22</sub> | U <sub>33</sub> | U <sub>23</sub> | U <sub>13</sub> | U <sub>12</sub> |
|------|-----------------|-----------------|-----------------|-----------------|-----------------|-----------------|
| Si01 | 18.8(3)         | 16.1(3)         | 17.5(3)         | 1.0(3)          | -0.5(2)         | -2.3(3)         |
| O002 | 20.8(9)         | 16.6(8)         | 21.3(9)         | 0.9(7)          | 3.6(7)          | -4.1(7)         |
| O003 | 30.8(10)        | 22.0(9)         | 22.9(10)        | -0.1(7)         | -6.0(8)         | -0.7(7)         |
| O004 | 25.9(10)        | 25.6(10)        | 31.7(11)        | 1.4(8)          | -6.8(8)         | -3.8(8)         |
| C005 | 19.7(12)        | 19.3(12)        | 26.2(14)        | 2.0(10)         | -2.7(10)        | 2.5(10)         |
| C006 | 27.5(14)        | 20.9(12)        | 21.8(14)        | 2.7(10)         | -1.2(10)        | -6.0(10)        |
| C007 | 29.4(14)        | 18.4(12)        | 17.4(12)        | -2.3(10)        | 5.2(10)         | -3.5(10)        |

|      |          |          |          |          |          |           |
|------|----------|----------|----------|----------|----------|-----------|
| C008 | 18.2(12) | 22.0(13) | 19.8(13) | 1.1(10)  | -0.5(10) | 6.2(10)   |
| C009 | 22.6(13) | 20.6(13) | 23.1(12) | 5.5(10)  | 1.6(10)  | -4.6(10)  |
| C00A | 15.4(11) | 22.5(12) | 15.0(12) | 4.5(9)   | 1.2(9)   | 4.7(10)   |
| C00B | 15.8(11) | 17.3(12) | 19.1(12) | 0.8(9)   | 1.6(9)   | -2.6(9)   |
| C00C | 21.6(12) | 22.5(12) | 22.7(13) | 4.0(10)  | 4.0(10)  | 7.5(10)   |
| C00D | 15.7(12) | 25.4(13) | 29.1(15) | 9.1(11)  | 2.2(10)  | 4.3(10)   |
| C00E | 23.8(13) | 21.6(12) | 23.1(13) | 3.1(10)  | 1.0(10)  | -1.5(10)  |
| C00F | 19.0(12) | 17.1(11) | 21.4(13) | 0.2(10)  | 1.4(10)  | 1.8(9)    |
| C00G | 16.2(10) | 16.6(10) | 22.3(12) | -1.2(11) | 1.0(9)   | 0.2(10)   |
| C00H | 20.1(12) | 18.7(12) | 18.8(12) | 0.7(10)  | -0.7(9)  | 3.8(9)    |
| C00I | 30.1(14) | 26.1(13) | 21.9(13) | 6.2(11)  | 6.4(11)  | 8.8(11)   |
| C00J | 44.1(17) | 22.8(13) | 20.9(14) | 0.5(11)  | 3.2(12)  | -2.7(12)  |
| C00K | 24.3(12) | 33.0(14) | 28.1(13) | 10.9(13) | -4.1(10) | -8.3(13)  |
| C00L | 18.2(12) | 22.6(12) | 20.2(13) | 4.4(10)  | -4.4(10) | 0.7(10)   |
| C00M | 29.1(15) | 28.3(14) | 28.7(15) | -2.0(11) | 3.0(11)  | -9.5(11)  |
| C00N | 18.9(12) | 29.2(14) | 29.2(15) | 7.6(11)  | 3.9(11)  | 3.1(11)   |
| C00O | 34.7(16) | 35.5(15) | 32.7(16) | -5.1(13) | -4.2(12) | 9.3(13)   |
| C00P | 38.2(17) | 35.8(16) | 34.3(17) | -5.4(13) | 8.4(13)  | -17.5(13) |
| C00Q | 64(2)    | 23.6(14) | 25.8(15) | 4.9(12)  | 11.6(14) | -4.2(14)  |
| C00R | 34.4(15) | 31.7(15) | 29.6(15) | 4.9(12)  | 9.0(12)  | 17.5(12)  |
| C00S | 49.4(19) | 32.5(15) | 23.8(15) | 7.1(13)  | -0.4(13) | -20.5(14) |
| C00T | 22.7(14) | 42.4(17) | 40.3(18) | 17.6(14) | -0.3(13) | 4.6(12)   |
| C00U | 77(2)    | 37.1(16) | 17.4(13) | -1.5(14) | 5.2(14)  | -9.3(19)  |
| C00V | 55(2)    | 31.4(15) | 30.8(16) | -7.0(13) | 15.6(14) | -23.3(14) |
| C00W | 35.8(17) | 45.1(18) | 41.7(19) | 1.3(15)  | 3.9(14)  | 18.0(14)  |
| C00X | 32.3(17) | 58(2)    | 50(2)    | 30.3(18) | -5.4(14) | 1.8(15)   |

**Table S7 Bond Lengths for [d<sub>9</sub>-(*R,R*)-16].**

| Atom | Atom | Length/Å   |  | Atom | Atom | Length/Å |
|------|------|------------|--|------|------|----------|
| Si01 | O002 | 1.6605(18) |  | C00A | C00N | 1.493(4) |
| Si01 | C006 | 1.897(3)   |  | C00B | C00G | 1.471(4) |
| Si01 | C007 | 1.874(3)   |  | C00C | C00D | 1.528(4) |
| Si01 | C00E | 1.876(3)   |  | C00C | C00H | 1.557(4) |
| O002 | C00B | 1.433(3)   |  | C00C | C00I | 1.530(4) |
| O003 | C00H | 1.423(3)   |  | C00C | C00R | 1.530(4) |
| O004 | C00L | 1.230(3)   |  | C00D | C00L | 1.501(4) |
| C005 | C00B | 1.522(3)   |  | C00E | C00O | 1.401(4) |
| C006 | C00S | 1.536(4)   |  | C00F | C00G | 1.200(4) |
| C006 | C00U | 1.520(4)   |  | C00F | C00H | 1.482(4) |
| C006 | C00X | 1.534(4)   |  | C00J | C00Q | 1.394(4) |
| C007 | C00J | 1.401(4)   |  | C00K | C00T | 1.377(5) |
| C007 | C00M | 1.398(4)   |  | C00M | C00P | 1.388(4) |
| C008 | C00A | 1.335(4)   |  | C00O | C00W | 1.395(5) |
| C008 | C00L | 1.458(4)   |  | C00P | C00V | 1.367(5) |
| C009 | C00E | 1.394(4)   |  | C00Q | C00V | 1.383(5) |
| C009 | C00K | 1.395(4)   |  | C00T | C00W | 1.383(5) |
| C00A | C00H | 1.541(3)   |  |      |      |          |

**Table S8 Bond Angles for [d<sub>9</sub>-(*R,R*)-16].**

| Atom | Atom | Atom | Angle/°    | Atom | Atom | Atom | Angle/°  |
|------|------|------|------------|------|------|------|----------|
| O002 | Si01 | C006 | 105.44(11) | C00I | C00C | C00H | 110.2(2) |
| O002 | Si01 | C007 | 107.56(10) | C00R | C00C | C00H | 110.5(2) |
| O002 | Si01 | C00E | 108.85(11) | C00R | C00C | C00I | 108.7(2) |
| C007 | Si01 | C006 | 116.13(12) | C00L | C00D | C00C | 114.9(2) |
| C007 | Si01 | C00E | 108.79(12) | C009 | C00E | Si01 | 121.3(2) |
| C00E | Si01 | C006 | 109.81(12) | C009 | C00E | C00O | 117.7(3) |

|      |      |      |            |  |      |      |      |          |
|------|------|------|------------|--|------|------|------|----------|
| C00B | O002 | Si01 | 124.97(15) |  | C00O | C00E | Si01 | 121.0(2) |
| C00S | C006 | Si01 | 106.92(18) |  | C00G | C00F | C00H | 177.7(3) |
| C00U | C006 | Si01 | 111.67(19) |  | C00F | C00G | C00B | 177.8(3) |
| C00U | C006 | C00S | 109.5(3)   |  | O003 | C00H | C00A | 110.9(2) |
| C00U | C006 | C00X | 109.3(3)   |  | O003 | C00H | C00C | 106.9(2) |
| C00X | C006 | Si01 | 111.8(2)   |  | O003 | C00H | C00F | 111.1(2) |
| C00X | C006 | C00S | 107.6(3)   |  | C00A | C00H | C00C | 110.8(2) |
| C00J | C007 | Si01 | 120.3(2)   |  | C00F | C00H | C00A | 105.9(2) |
| C00M | C007 | Si01 | 122.4(2)   |  | C00F | C00H | C00C | 111.3(2) |
| C00M | C007 | C00J | 116.9(3)   |  | C00Q | C00J | C007 | 121.2(3) |
| C00A | C008 | C00L | 122.7(2)   |  | C00T | C00K | C009 | 120.1(3) |
| C00E | C009 | C00K | 121.3(3)   |  | O004 | C00L | C008 | 122.1(2) |
| C008 | C00A | C00H | 121.7(2)   |  | O004 | C00L | C00D | 120.8(2) |
| C008 | C00A | C00N | 122.6(2)   |  | C008 | C00L | C00D | 117.0(2) |
| C00N | C00A | C00H | 115.7(2)   |  | C00P | C00M | C007 | 121.8(3) |
| O002 | C00B | C005 | 108.41(19) |  | C00W | C00O | C00E | 120.9(3) |
| O002 | C00B | C00G | 110.67(19) |  | C00V | C00P | C00M | 120.1(3) |
| C00G | C00B | C005 | 113.0(2)   |  | C00V | C00Q | C00J | 120.0(3) |
| C00D | C00C | C00H | 107.7(2)   |  | C00K | C00T | C00W | 119.9(3) |
| C00D | C00C | C00I | 110.6(2)   |  | C00P | C00V | C00Q | 120.0(3) |
| C00D | C00C | C00R | 109.1(2)   |  | C00T | C00W | C00O | 120.2(3) |

**Table S9 Torsion Angles for [d<sub>9</sub>-(*R,R*)-16].**

| <b>A</b> | <b>B</b> | <b>C</b> | <b>D</b> | <b>Angle/°</b> | <b>A</b> | <b>B</b> | <b>C</b> | <b>D</b> | <b>Angle/°</b> |
|----------|----------|----------|----------|----------------|----------|----------|----------|----------|----------------|
| Si01     | O002     | C00B     | C005     | -153.40(17)    | C00C     | C00D     | C00L     | C008     | -29.1(3)       |
| Si01     | O002     | C00B     | C00G     | 82.1(2)        | C00D     | C00C     | C00H     | O003     | -173.35(19)    |
| Si01     | C007     | C00J     | C00Q     | 173.7(2)       | C00D     | C00C     | C00H     | C00A     | -52.4(3)       |
| Si01     | C007     | C00M     | C00P     | -173.3(2)      | C00D     | C00C     | C00H     | C00F     | 65.1(3)        |
| Si01     | C00E     | C00O     | C00W     | 178.1(3)       | C00E     | Si01     | O002     | C00B     | -110.47(19)    |
| O002     | Si01     | C006     | C00S     | 65.0(2)        | C00E     | Si01     | C006     | C00S     | -52.1(2)       |
| O002     | Si01     | C006     | C00U     | -175.3(2)      | C00E     | Si01     | C006     | C00U     | 67.6(2)        |
| O002     | Si01     | C006     | C00X     | -52.5(2)       | C00E     | Si01     | C006     | C00X     | -169.6(2)      |
| O002     | Si01     | C007     | C00J     | -95.0(2)       | C00E     | Si01     | C007     | C00J     | 22.8(3)        |
| O002     | Si01     | C007     | C00M     | 77.5(2)        | C00E     | Si01     | C007     | C00M     | -164.7(2)      |
| O002     | Si01     | C00E     | C009     | -4.9(2)        | C00E     | C009     | C00K     | C00T     | 1.1(4)         |
| O002     | Si01     | C00E     | C00O     | 175.8(2)       | C00E     | C00O     | C00W     | C00T     | 0.7(5)         |
| C006     | Si01     | O002     | C00B     | 131.76(19)     | C00H     | C00C     | C00D     | C00L     | 53.8(3)        |
| C006     | Si01     | C007     | C00J     | 147.2(2)       | C00I     | C00C     | C00D     | C00L     | -66.7(3)       |
| C006     | Si01     | C007     | C00M     | -40.3(3)       | C00I     | C00C     | C00H     | O003     | -52.7(3)       |
| C006     | Si01     | C00E     | C009     | 110.0(2)       | C00I     | C00C     | C00H     | C00A     | 68.3(3)        |
| C006     | Si01     | C00E     | C00O     | -69.2(3)       | C00I     | C00C     | C00H     | C00F     | -174.2(2)      |
| C007     | Si01     | O002     | C00B     | 7.2(2)         | C00J     | C007     | C00M     | C00P     | -0.5(4)        |
| C007     | Si01     | C006     | C00S     | -176.0(2)      | C00J     | C00Q     | C00V     | C00P     | -0.7(5)        |
| C007     | Si01     | C006     | C00U     | -56.3(2)       | C00K     | C009     | C00E     | Si01     | -179.0(2)      |
| C007     | Si01     | C006     | C00X     | 66.4(3)        | C00K     | C009     | C00E     | C00O     | 0.3(4)         |
| C007     | Si01     | C00E     | C009     | -121.9(2)      | C00K     | C00T     | C00W     | C00O     | 0.7(5)         |
| C007     | Si01     | C00E     | C00O     | 58.9(3)        | C00L     | C008     | C00A     | C00H     | -3.2(4)        |
| C007     | C00J     | C00Q     | C00V     | -0.2(5)        | C00L     | C008     | C00A     | C00N     | 179.5(2)       |
| C007     | C00M     | C00P     | C00V     | -0.3(5)        | C00M     | C007     | C00J     | C00Q     | 0.8(4)         |
| C008     | C00A     | C00H     | O003     | 148.3(2)       | C00M     | C00P     | C00V     | C00Q     | 0.9(5)         |

|      |      |      |      |          |  |      |      |      |      |           |
|------|------|------|------|----------|--|------|------|------|------|-----------|
| C008 | C00A | C00H | C00C | 29.7(3)  |  | C00N | C00A | C00H | O003 | -34.2(3)  |
| C008 | C00A | C00H | C00F | -91.1(3) |  | C00N | C00A | C00H | C00C | -152.7(2) |
| C009 | C00E | C00O | C00W | -1.2(4)  |  | C00N | C00A | C00H | C00F | 86.4(3)   |
| C009 | C00K | C00T | C00W | -1.6(4)  |  | C00R | C00C | C00D | C00L | 173.8(2)  |
| C00A | C008 | C00L | O004 | 180.0(2) |  | C00R | C00C | C00H | O003 | 67.5(3)   |
| C00A | C008 | C00L | C00D | 2.1(4)   |  | C00R | C00C | C00H | C00A | -171.6(2) |
| C00C | C00D | C00L | O004 | 152.9(2) |  | C00R | C00C | C00H | C00F | -54.0(3)  |

**Table S10 Hydrogen Atom Coordinates ( $\text{\AA}\times 10^4$ ) and Isotropic Displacement Parameters ( $\text{\AA}^2\times 10^3$ ) for [d<sub>9</sub>-(*R,R*)-16].**

| Atom | <i>x</i> | <i>y</i> | <i>z</i> | U(eq) |
|------|----------|----------|----------|-------|
| H003 | 3069.37  | 6208.21  | 5806.36  | 38    |
| H00A | 1122.72  | 8104.45  | 3574.72  | 33    |
| H00B | 273.52   | 7471.71  | 3806.12  | 33    |
| H00C | 423.16   | 7875.17  | 2718.12  | 33    |
| H008 | 2902.7   | 2955.07  | 4518.99  | 24    |
| H009 | 3580.1   | 6761.62  | 3076.29  | 27    |
| H00D | 789.16   | 6195.57  | 2732.04  | 21    |
| H00E | 631.63   | 3577.69  | 5958.99  | 28    |
| H00F | 730.86   | 4257.82  | 5011.61  | 28    |
| H00G | 1521.35  | 3917.75  | 7512.36  | 39    |
| H00H | 2304.92  | 4690.92  | 7489.29  | 39    |
| H00I | 2377.35  | 3673.94  | 6907.75  | 39    |
| H00J | 2466.02  | 4155.11  | 2492.57  | 35    |
| H00K | 5040.03  | 6405.56  | 3526.07  | 34    |
| H00M | 570.86   | 5369.95  | 720.13   | 34    |
| H00L | 4138.21  | 4700.77  | 5422.84  | 39    |
| H00N | 3795.3   | 5236.65  | 4442.71  | 39    |
| H00O | 4067.21  | 4103.04  | 4412.01  | 39    |

|      |         |         |          |    |
|------|---------|---------|----------|----|
| H00P | 3706.14 | 4770.84 | 827.72   | 41 |
| H00Q | -303.39 | 3971.84 | 938.06   | 43 |
| H00R | 1584.17 | 2749.86 | 2693.52  | 45 |
| H00S | 626.53  | 5791.84 | 5929.96  | 48 |
| H00T | 1228.42 | 6004.31 | 6879.69  | 48 |
| H00U | 470.42  | 5200.94 | 6927.38  | 48 |
| H00V | 2740.2  | 8105.19 | 951.97   | 53 |
| H00W | 2895.2  | 8090.77 | -207.23  | 53 |
| H00X | 3505.8  | 7451.83 | 513.03   | 53 |
| H00Y | 5847.99 | 5280.46 | 2597.59  | 42 |
| H00Z | 3157.57 | 5912.37 | -445.51  | 66 |
| H    | 2544.48 | 6520.39 | -1189.99 | 66 |
| HA   | 2169.78 | 5579.02 | -636.24  | 66 |
| H00  | 205.16  | 2657.18 | 1900.81  | 47 |
| H1   | 5178.18 | 4451    | 1260.01  | 49 |
| H2   | 933.41  | 6691.9  | -69.87   | 70 |
| HB   | 1368.86 | 7636.43 | -557.45  | 70 |
| HC   | 1151.28 | 7638.01 | 587.56   | 70 |
